# Supplementary material
Source: HighWire-hosted journal article supplement (https://erj.ersjournals.com/highwire/filestream/131029/field_highwire_adjunct_files/0/ERJ-02049-2015_Appendix_1.pdf)
Supplement: ERJ-02049-2015_Appendix_1.pdf [file ERJ-02049-2015_Appendix_1.pdf]

## Appendix 1. List of contributors to the International Consortium for Health Outcomes Measurement

| Hospitals and health systems               | Patient advocacy and specialty organizations           | Payers and governments                  | Cofounders                                 |
|--------------------------------------------|--------------------------------------------------------|-----------------------------------------|--------------------------------------------|
| Alliance of Dedicated Cancer Centers       | American Heart Association/American Stroke Association | Agency for Clinical Innovation          | Institute for Strategy and Competitiveness |
| American Society for Clinical Pathology    | British Heart Foundation                               | Blue Cross Blue Shield of Massachusetts | Karolinska Institutet                      |
| Aneurin Bevan University Health Board      | Carl Bennet AB                                         | Dutch Institute for Clinical Auditing   | The Boston Consulting Group                |
| Boston Children's Hospital                 | Great Ormond Street Hospital Charity                   | Harvard Pilgrim HealthCare              |                                            |
| Connecticut Joint Replacement Institute    | International Urogynecological Association             | NHS Camden Clinical Commissioning Group |                                            |
| Douglas Mental Health University Institute | Macula Foundation                                      | The Scottish Government                 |                                            |
| Erasmus University Medical Center          | Macular Society UK                                     | Centraal Ziekenfonds                    |                                            |
| Générale de Santé                          | MD Anderson Physicians Network                         |                                         |                                            |
| Great Ormond Street Hospital for Children  | Movember Foundation                                    |                                         |                                            |
| Hoag Memorial Hospital Presbyterian        | Ordem dos Enfermeiros                                  |                                         |                                            |
| Hoag Orthopedic Institute                  | Retina Suisse                                          |                                         |                                            |
| Istituto Clinico Humanitas                 |                                                        |                                         |                                            |
| Jewish General Hospital Foundation         |                                                        |                                         |                                            |
| Koo Foundation Sun Yat-Sen Cancer Center   |                                                        |                                         |                                            |
| Leiden University Cancer Center            |                                                        |                                         |                                            |
| Mayo Clinic                                |                                                        |                                         |                                            |
| MD Anderson Cancer Center                  |                                                        |                                         |                                            |
| NHS England                                |                                                        |                                         |                                            |
| Partners Healthcare                        |                                                        |                                         |                                            |
| Ramsay Health Care                         |                                                        |                                         |                                            |
| Sahlgrenska Universitetssjukhuset          |                                                        |                                         |                                            |
| Saint Francis Care                         |                                                        |                                         |                                            |
| Santeon                                    |                                                        |                                         |                                            |
| · Canisius-Wilhelmina Ziekenhuis           |                                                        |                                         |                                            |
| · Catharina Ziekenhuis                     |                                                        |                                         |                                            |

- Martini Ziekenhuis
  - Medisch Spectrum Twente
  - Onze Lieve Vrouwe Gasthuis
  - St. Antonius Ziekenhuis
- Save Sight Institute  
St. Erik Eye Hospital  
Stichting Benchmark GGZ  
Tenet Health  
Texas Children's Hospital  
The Chaim Sheba Medical Center at  
Tel Hashomer  
The Children's Hospital of  
Philadelphia  
The Hospital for Sick Children  
(SickKids)  
UZ Leuven  
WillsEye Hospital
